# Supplementary material
Source: publisher site journal article supplement (https://www.dovepress.com/article/254316)
Supplement: Supplementary file 1 [file get_supplementary_file.php]

| Factor | N (%) or median (range) |
| --- | --- |
| age | 68.08 (50-90) |
| gender |  |
| female | 106 (26.2%) |
| male | 299 (73.8%) |
| grade |  |
| low | 21 (5.0%) |
| high | 384 (95%) |
| stage |  |
| I | 2 (0.4%) |
| II | 129 (31.9%) |
| III | 139 (34.3%) |
| IV | 135 (33.3%) |

Supplementary Table 1 Patient characteristics and pathologic features

Supplementary Table 2 Prognostic value of DEGs in low grade and high grade of BLCA tumors validated by TCGA database

| Gene | p value |
| --- | --- |
| FADS1 | 0.0000075 |
| TM4SF1 | 0.002072 |
| CRTAC1 | 0.003204 |
| HSD17B2 | 0.005248 |
| MST1R | 0.005507 |
| PHGDH | 0.005588 |
| BTBD16 | 0.006728 |
| FBN2 | 0.00789 |
| CTSE | 0.008339 |
| ANLN | 0.012581 |
| PLCD3 | 0.037367 |
| CDKN3 | 0.04206 |
| HMGB2 | 0.044853 |

Supplementary Table 3 Hub genes expression level in BLCA patients

| Gene | Low grade (Mean ± SEM) | High grade(Mean ± SEM) | p value |
| --- | --- | --- | --- |
| FADS1 | 1.601 ± 0.4624 | 5.679 ± 0.3447 | 0.0063 |
| TM4SF1 | 11.3 ± 3.483 | 55.45 ± 3.411 | 0.0028 |
| CRTAC1 | 85.54 ± 40.5 | 12.54 ± 2.837 | <0.0001 |
| HSD17B2 | 20.91 ± 2.782 | 4.88 ± 0.4152 | <0.0001 |
| MST1R | 15.74 ± 2.216 | 7.921 ± 0.4288 | <0.0001 |

Supplementary Table 4 Univariate and multivariate Cox proportional hazard regression analyses of overall survival (OS) in BLCA patients

|  | Univariate analysis | |  | Multivariate analysis | |
| --- | --- | --- | --- | --- | --- |
| Variable | HR (95% CI) | p value |  | HR (95% CI) | p value |
| Age | 2.27 (1.39-3.71) | 0.001 |  | 1.93 (1.18-3.17) | 0.009 |
| Gender | 0.88 (0.62-1.25) | 0.485 |  | 0.86 (0.60-1.23) | 0.404 |
| Stage | 1.84 (1.50-2.27) | <0.001 |  | 1.65 (1.33-2.04) | <0.001 |
| FADS1 | 1.02 (1.01-1.04) | 0.012 |  | 1.03 (1.01-1.05) | 0.014 |
| TM4SF1 | 1.00 (1.00-1.01) | <0.001 |  | 1.00 (1.00-1.01) | 0.003 |
| CRTAC1 | 0.99 (0.99-1.00) | 0.083 |  | 1.00 (0.99-1.00) | 0.618 |
| HSD17B2 | 0.97 (0.94-0.99) | 0.006 |  | 0.99 (0.97-1.02) | 0.671 |
| MST1R | 0.96 (0.93-0.98) | <0.001 |  | 0.96 (0.94-0.99) | 0.006 |

Supplementary Figure S1


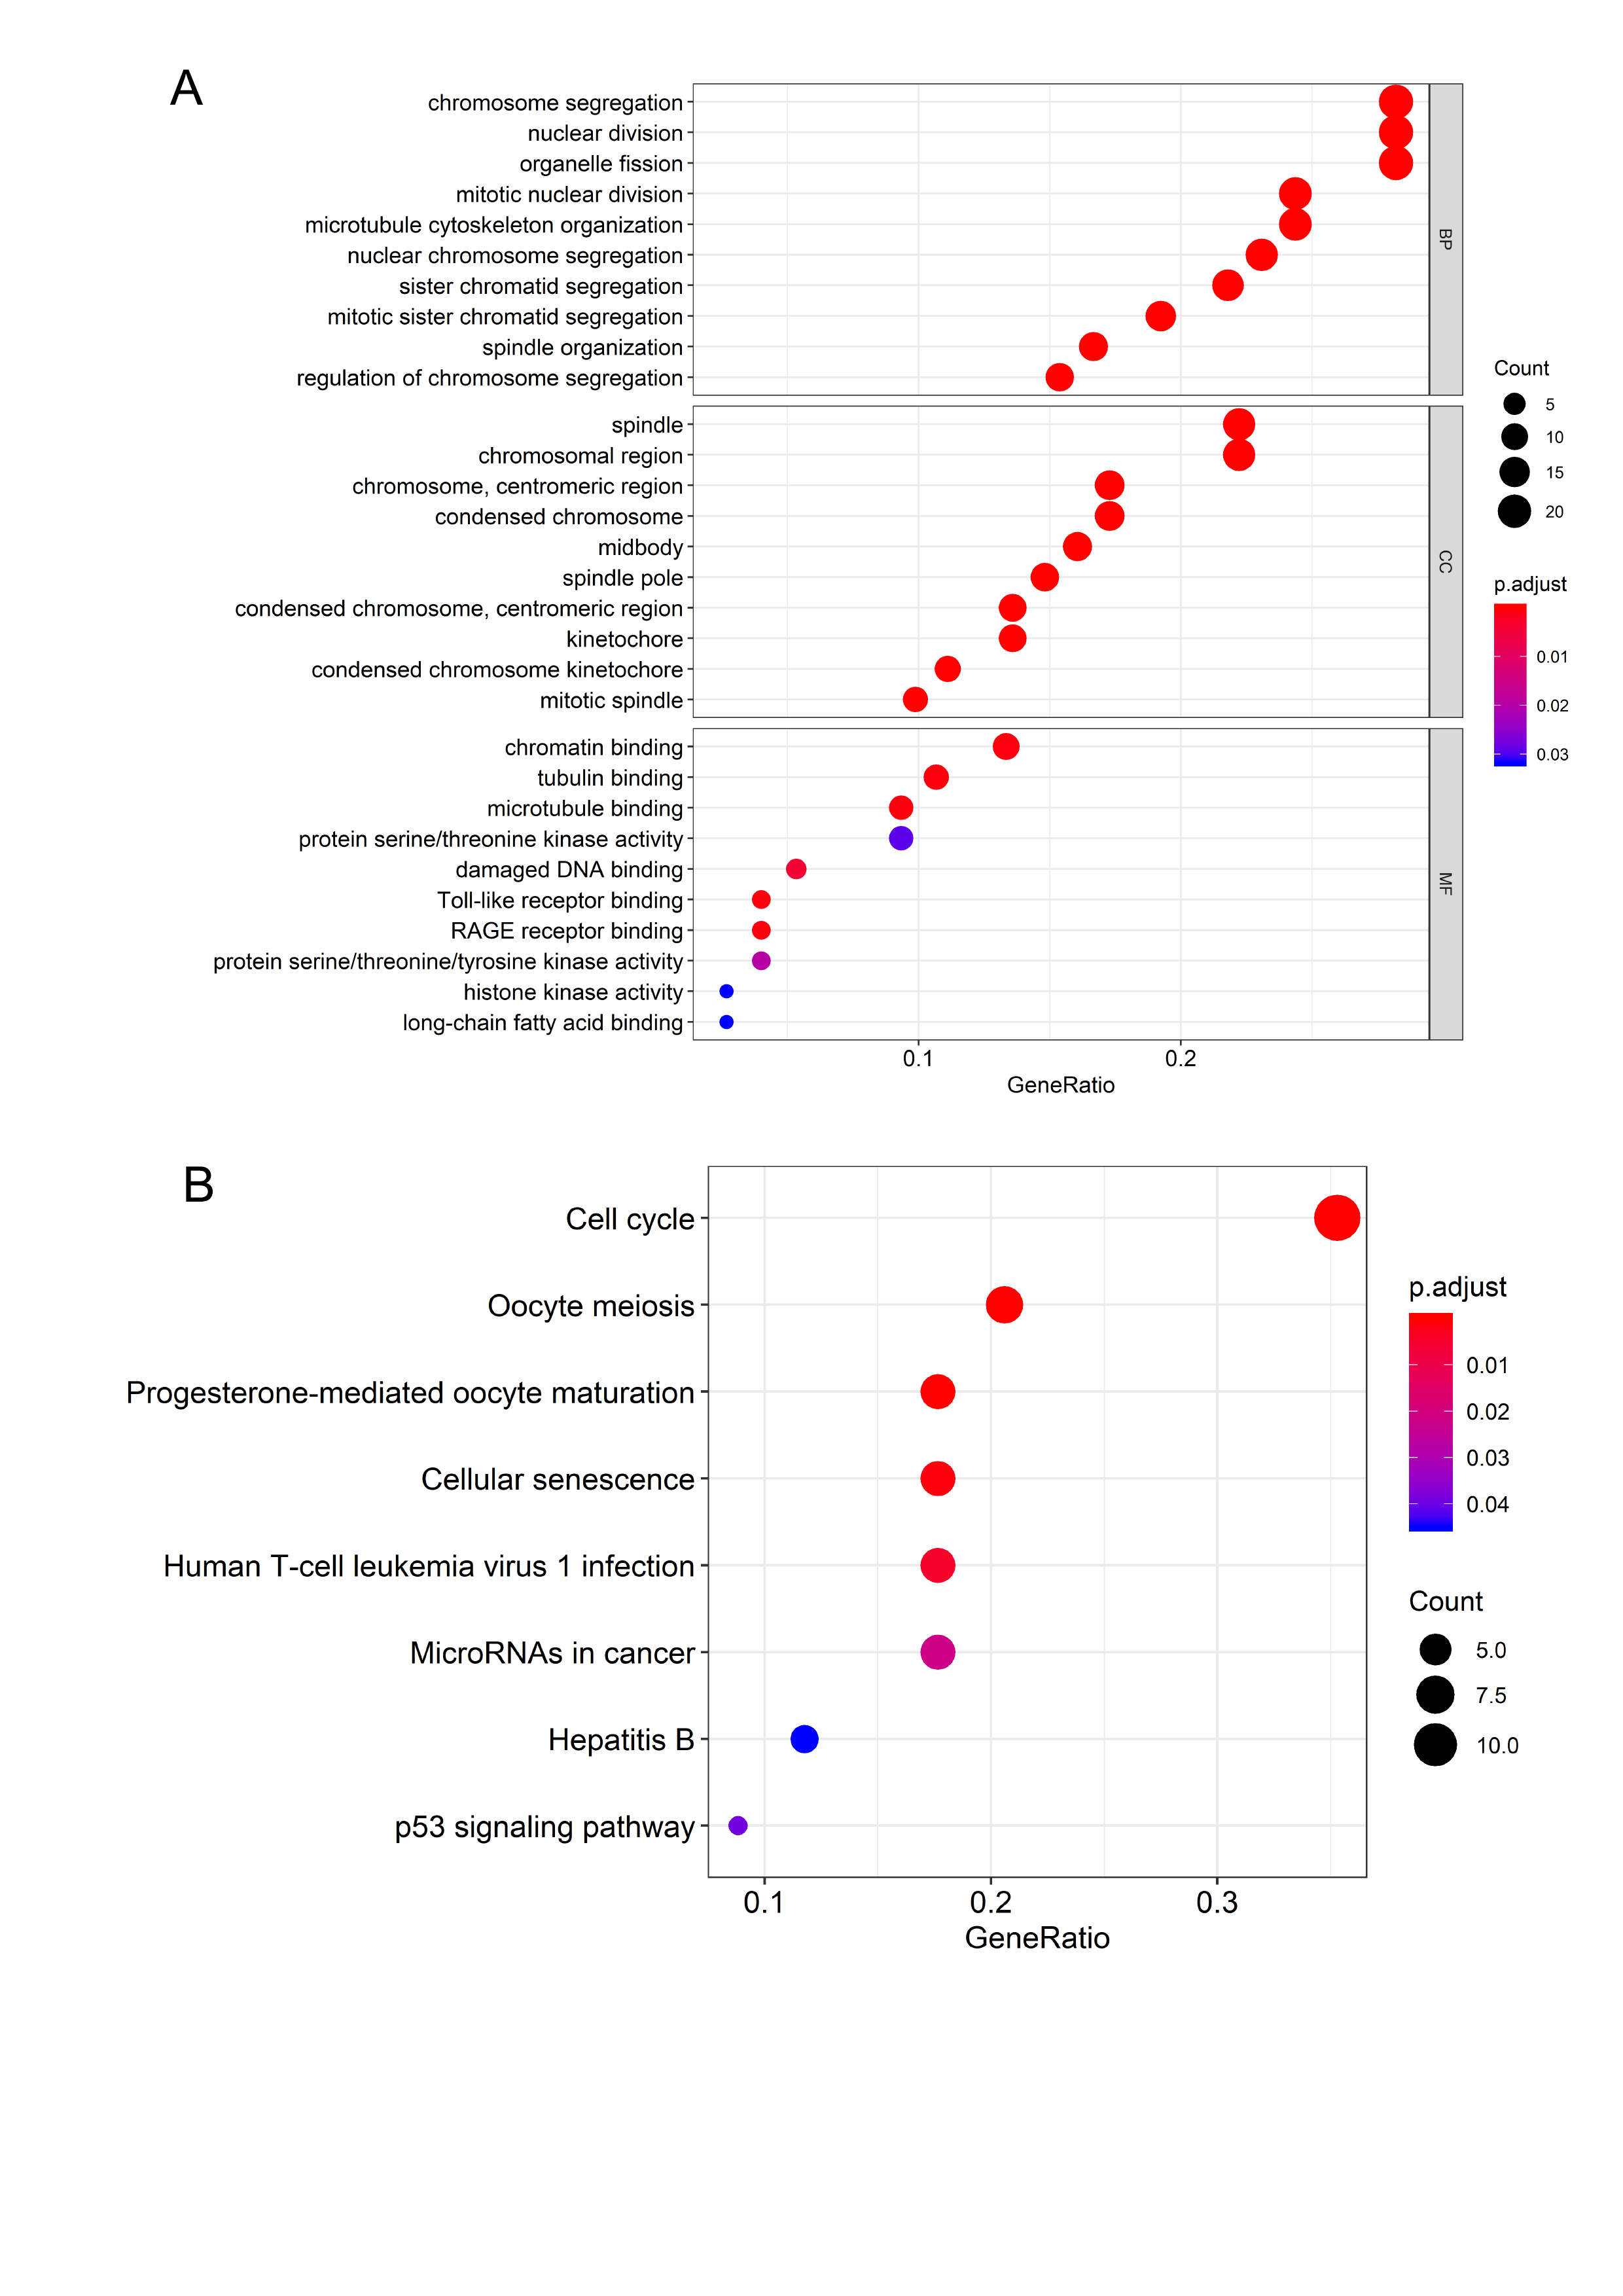


Figure. S1 The functional analysis of up-regulated DEGs. (A) Gene Ontology analysis and significant enriched GO terms related with tumor grade. (B) KEGG pathway enrichment terms related with tumor grade.

Supplementary Figure S2


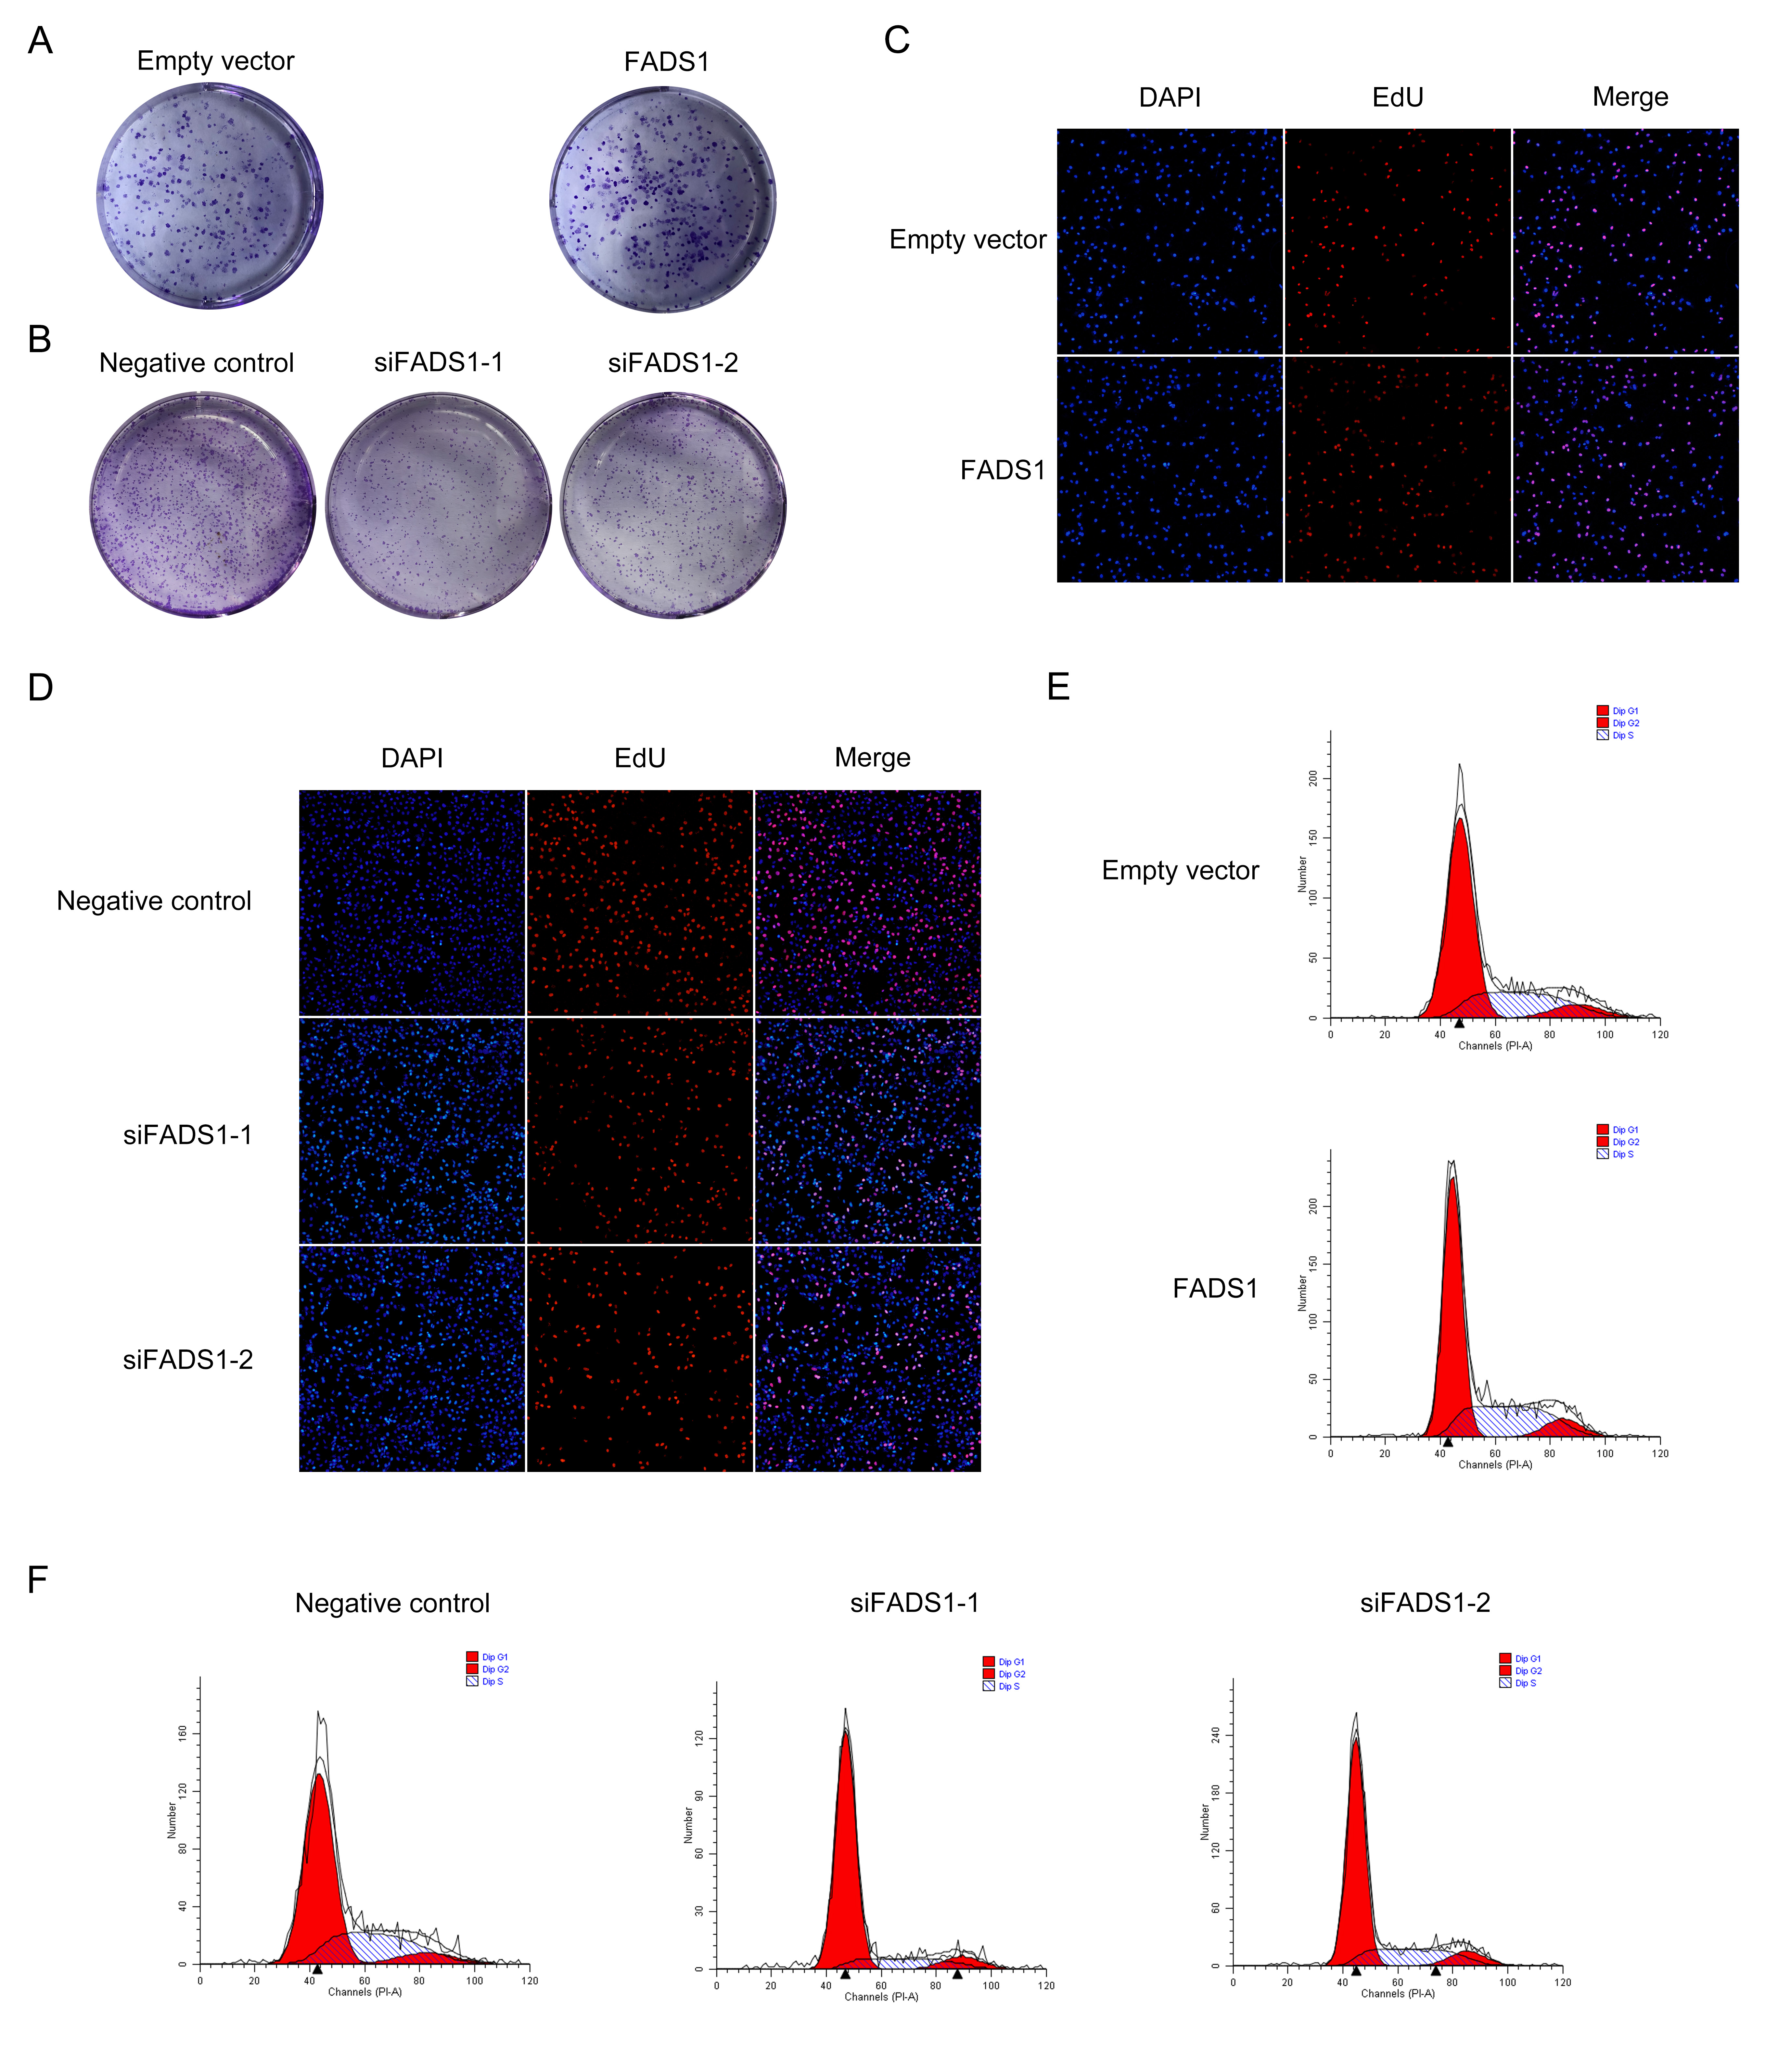


Figure. S2 (A, B) The representative figures of the colony-formation assay of 5637 cells. (C, D) The representative figures of the EdU assays, red spot represents replicated cells. (E, F) Representative figures of the cell cycle analysis.
